# Supplementary material
Source: PubMed Central journal article supplement (PMC4016721)

Supplemental Figure 3

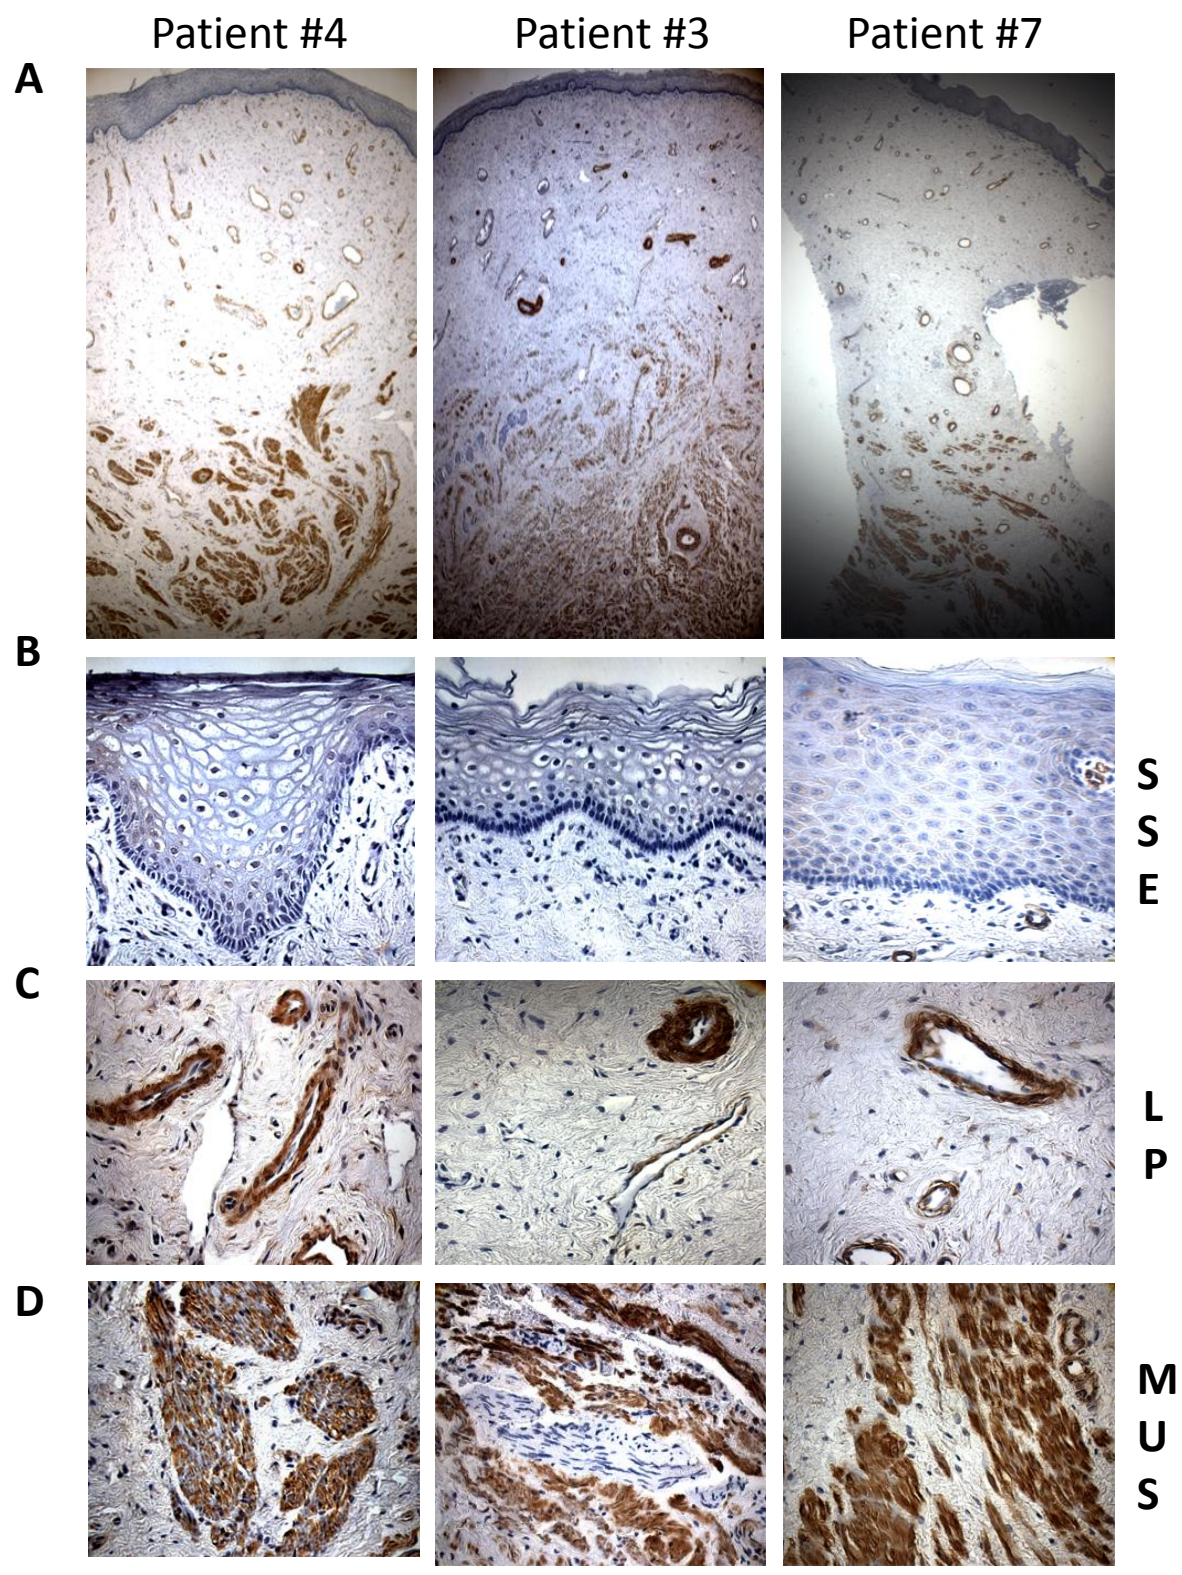

Supplement: Supplemental_Figure_3_Alarab.pdf [file Supplemental_Figure_3_Alarab.pdf]

Supplemental Figure 4

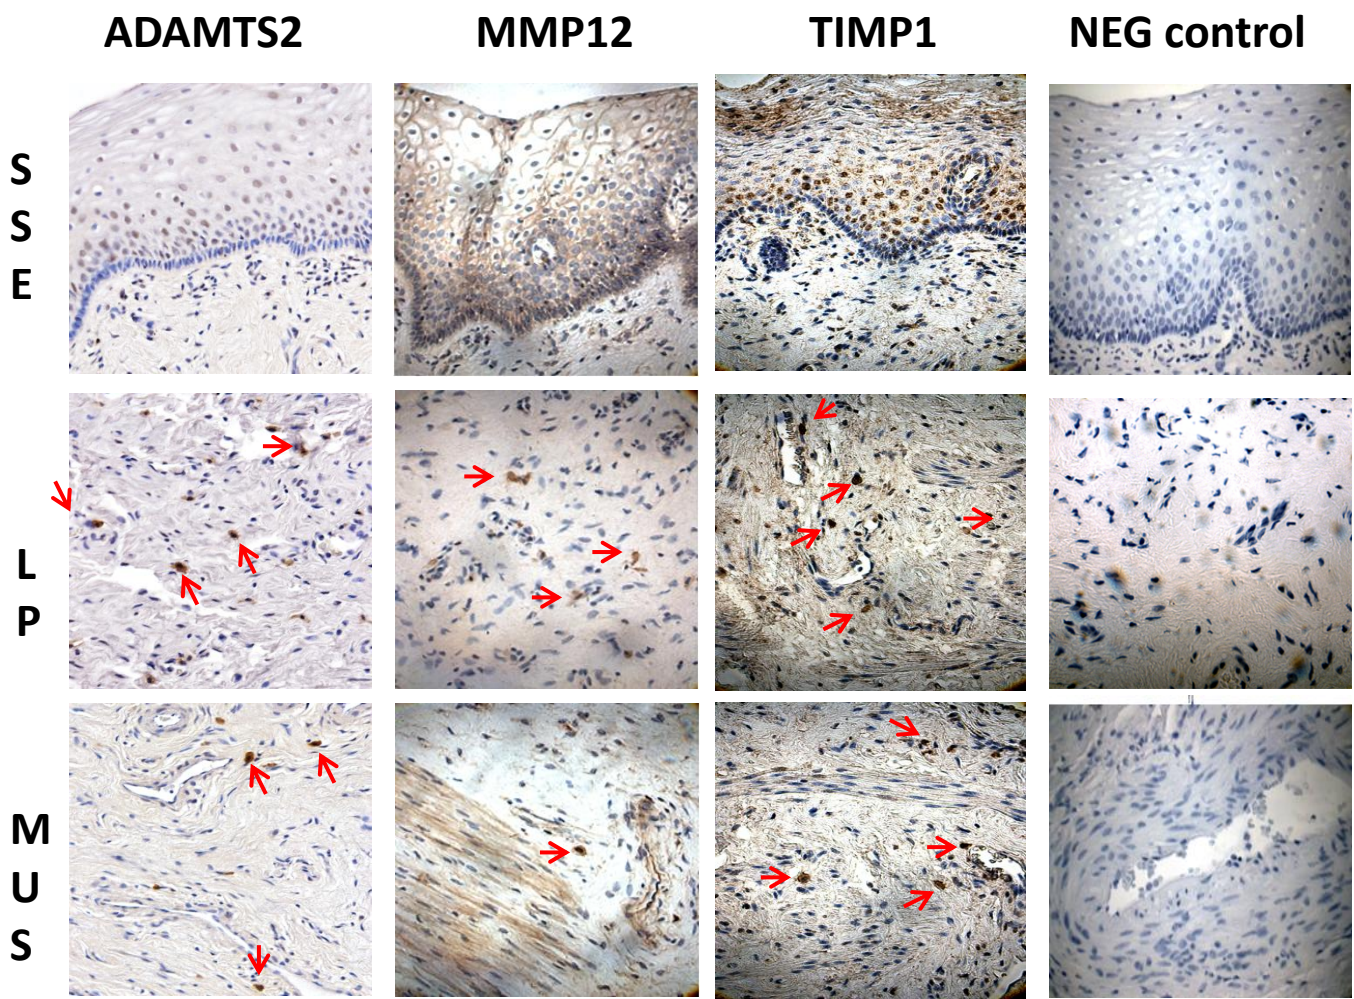

Supplement: Supplemental_Figure_4_Alarab.pdf [file Supplemental_Figure_4_Alarab.pdf]
